# Supplementary material
Source: PubMed Central journal article supplement (PMC6314678)

# Supplementary Figure S1

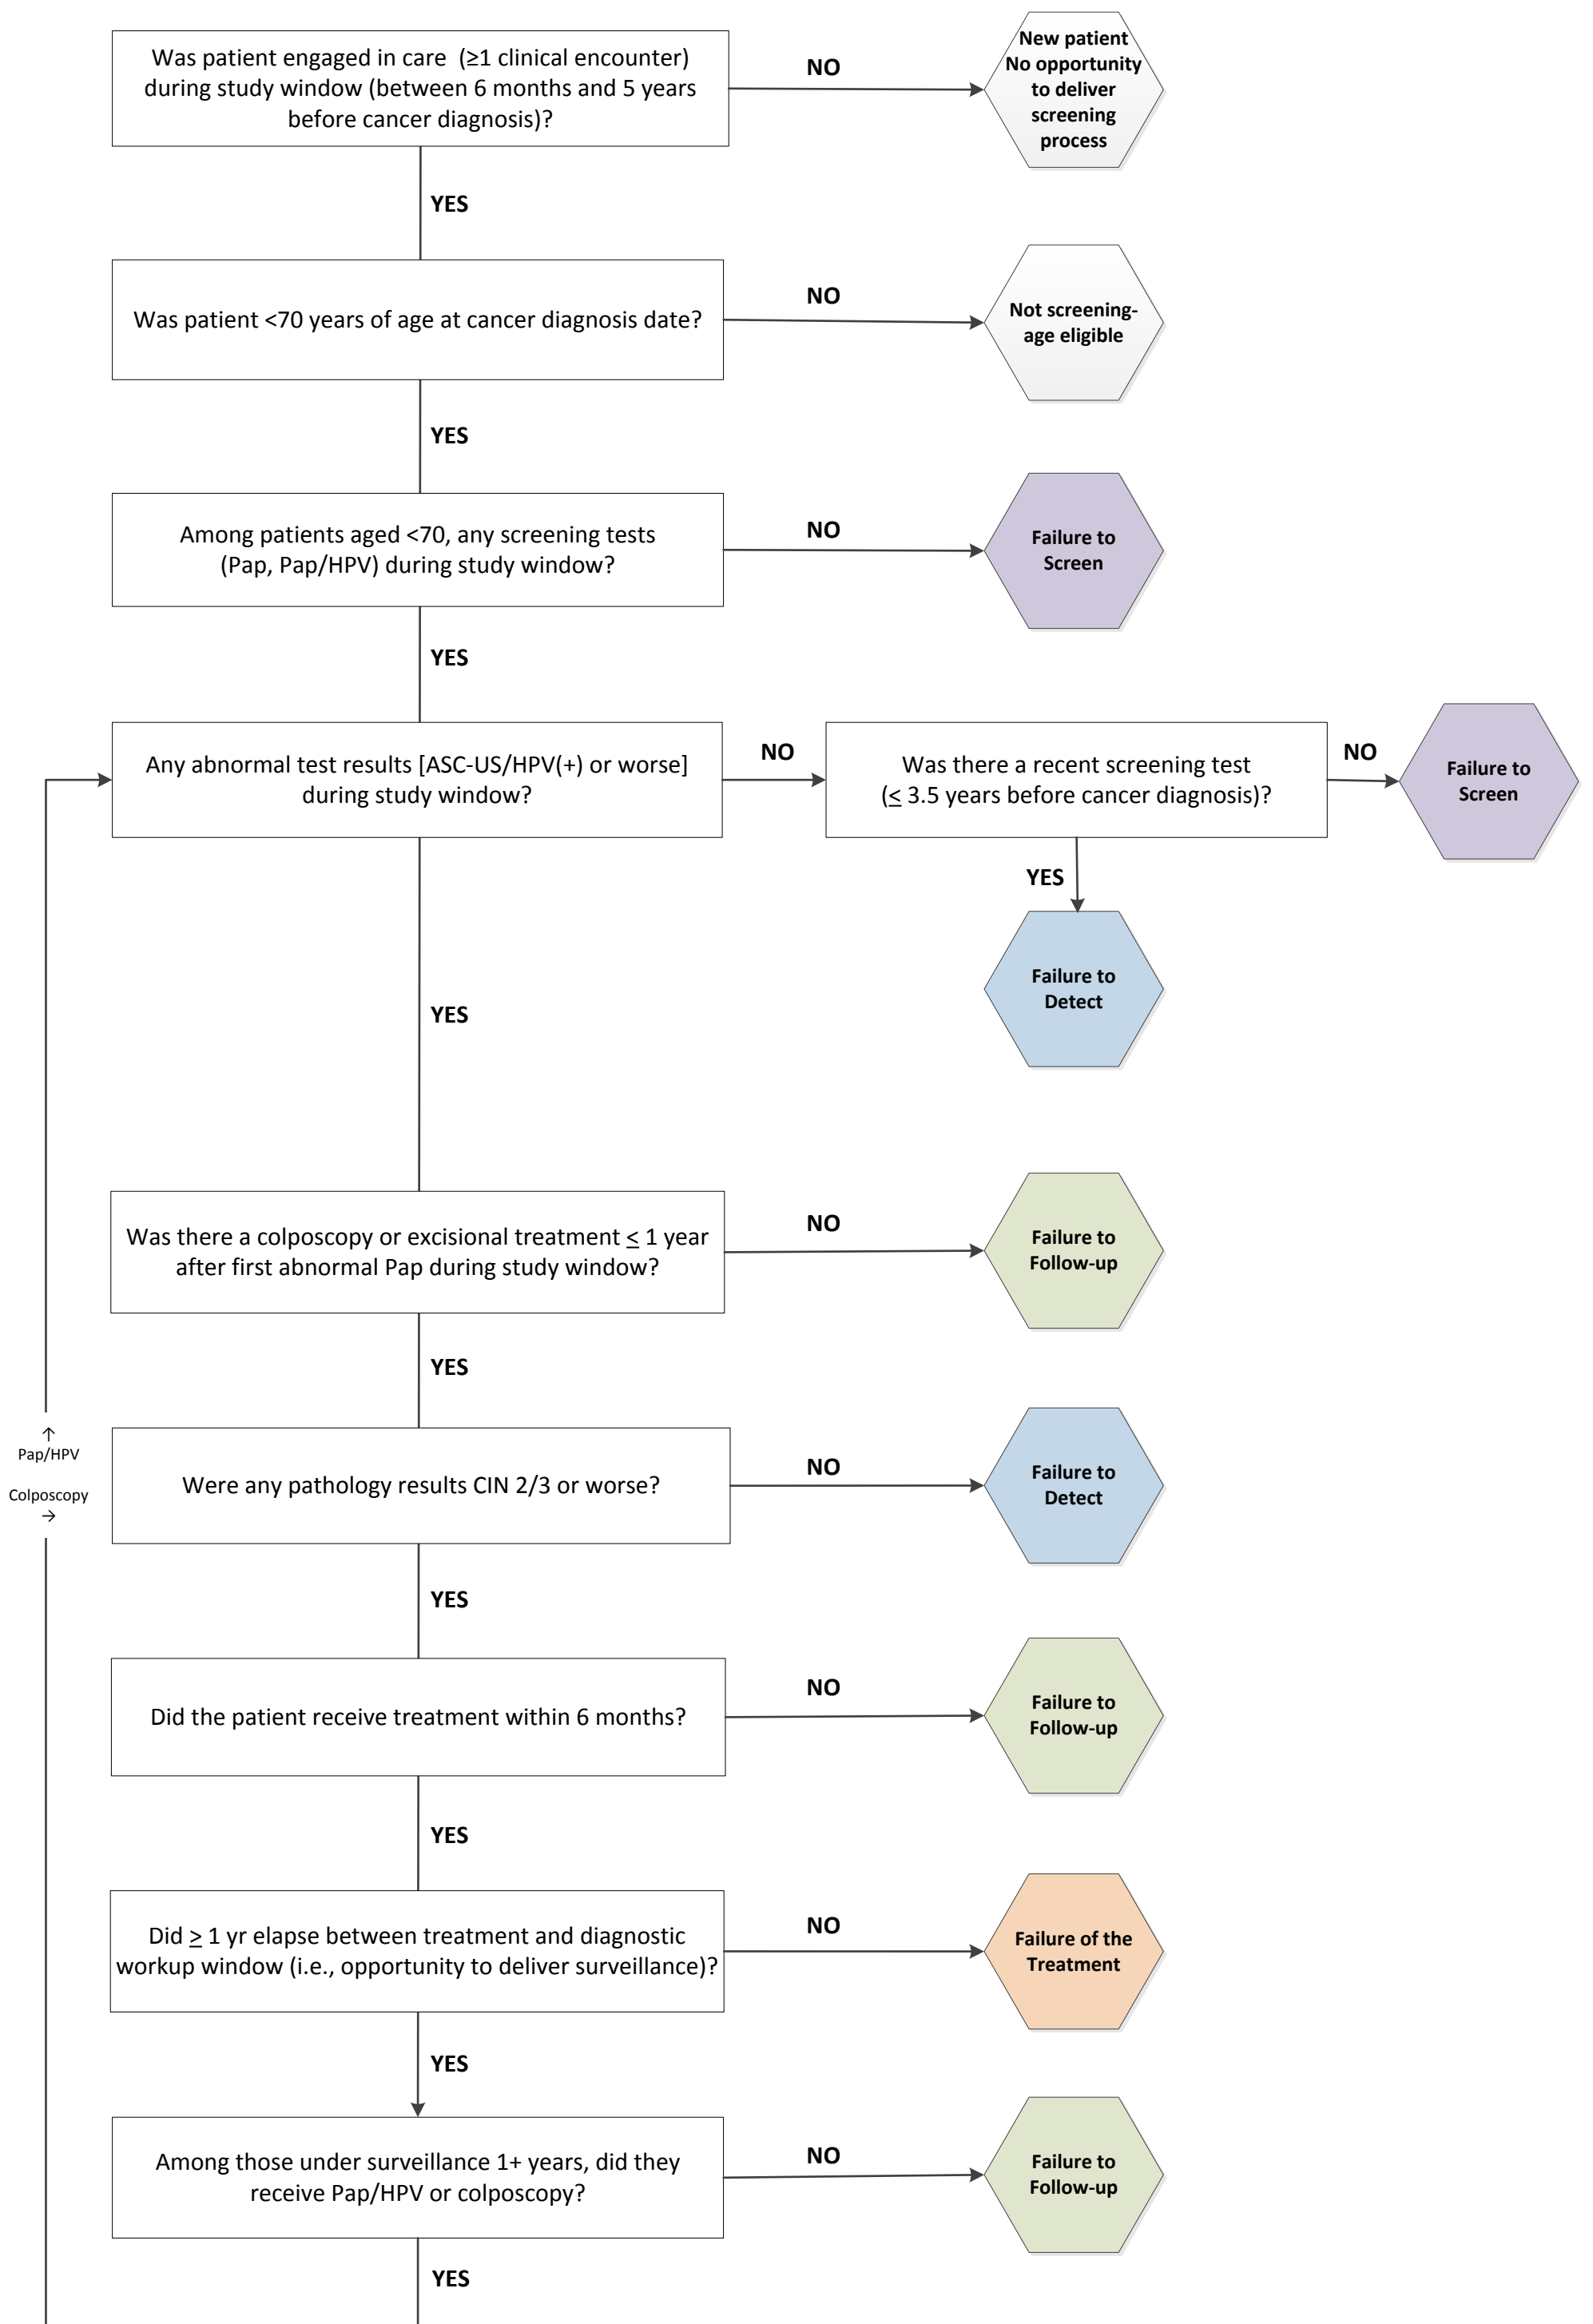

Supplement: NIHMS1505942-supplement-1.pdf [file NIHMS1505942-supplement-1.pdf]
